# Supplementary material
Source: MDPI journal article supplement (https://www.mdpi.com/2073-4344/11/10/1200)

Supporting Information

# Synthesis of 2-Methylquinoxaline Derivatives from Glycerol and Diamines Catalyzed by Iridium Complexes Bearing an *N*-Heterocyclic Carbene Ligand

Toshiki Tanaka, Akane Enomoto, Shohichi Furukawa and Ken-ichi Fujita\*

Graduate School of Human and Environmental Studies, Kyoto University, Kyoto 606-8501, Japan; tanaka.toshiki.a82@kyoto-u.jp (T.T.); enomoto.akane.66c@kyoto-u.jp (A.E.); furukawa.shohichi.37z@st.kyoto-u.ac.jp (S.F.)

\*Correspondence: fujita.kenichi.6a@kyoto-u.ac.jp; Tel.: +81-75-753-6827

## Contents

**Figure S1.** Illustration of the reaction setup for optimization of the reaction conditions for the synthesis of 2-methylquinoxaline (**2a**) shown in Tables 1 and 2. S2

**Figure S2.** Illustration of the reaction setup for quantitative analysis of the evolved hydrogen along with the formation of **2a** shown in Scheme 3. S2

**Figure S3.** GC analysis of the evolved hydrogen along with the formation of **2a** shown in Scheme 3. S3

NMR charts of the organic products. S4

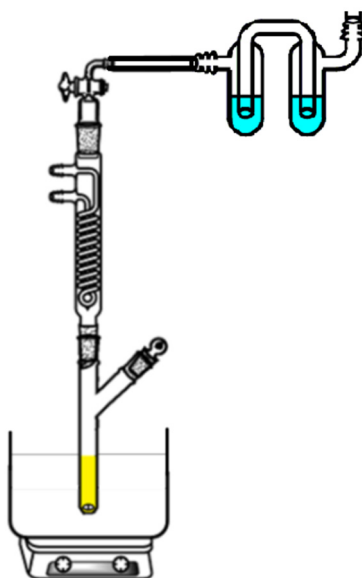

**Figure S1.** Illustration of the reaction setup for optimization of the reaction conditions for the synthesis of 2-methyquinoxaline (**2a**) shown in Tables 1 and 2.

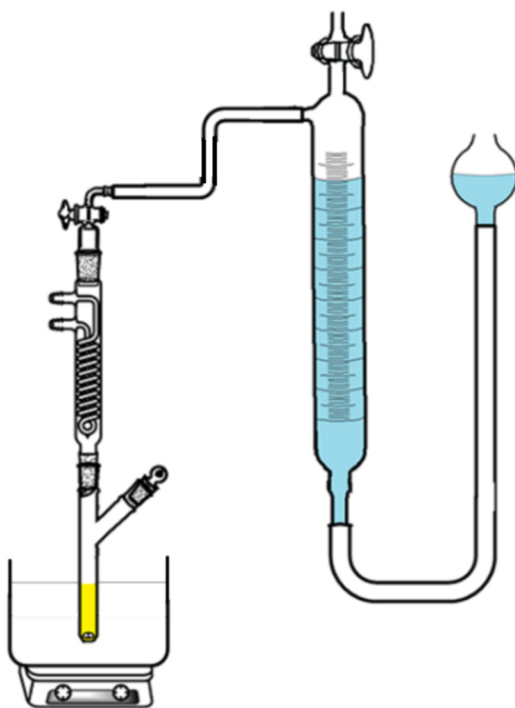

**Figure S2.** Illustration of the reaction setup for quantitative analysis of the evolved hydrogen along with the formation of **2a** shown in Scheme 3.

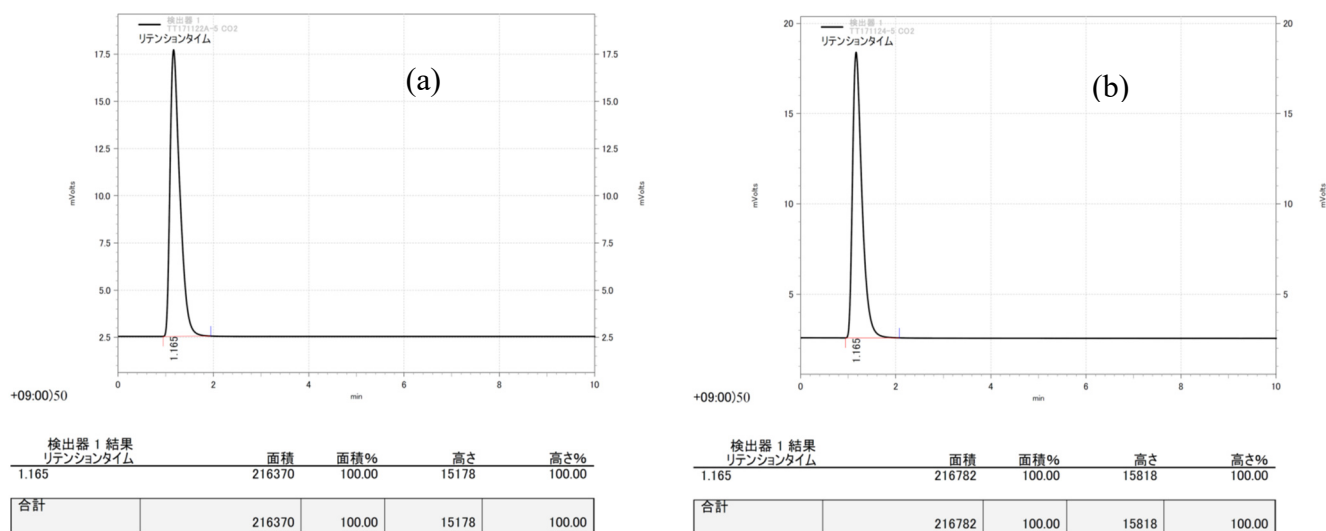

**Figure S3.** GC analysis of the evolved hydrogen along with the formation of **2a** shown in Scheme 3. (a) The chromatogram of the evolved gas along with the formation of **2a**. (b) The chromatogram of the standard hydrogen gas.

NMR charts of the organic products.

$^1\text{H}$  NMR

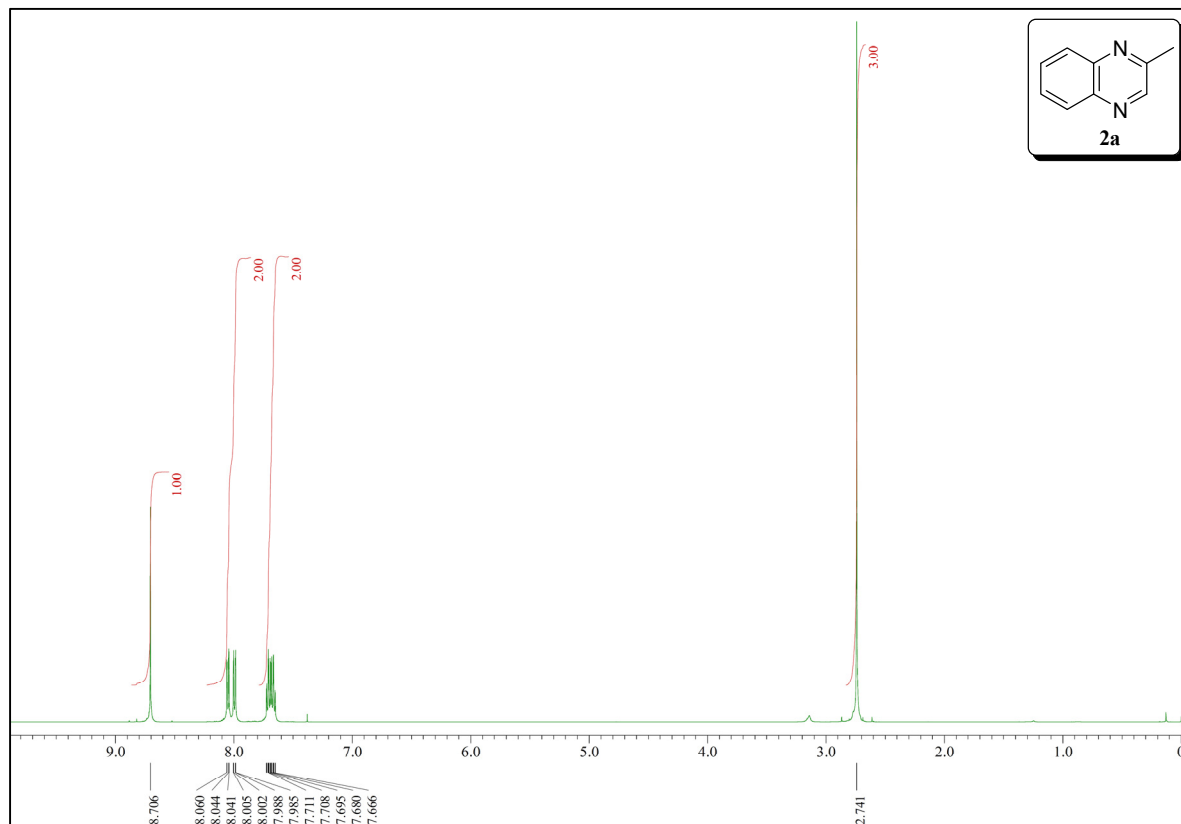

$^{13}\text{C}\{^1\text{H}\}$  NMR

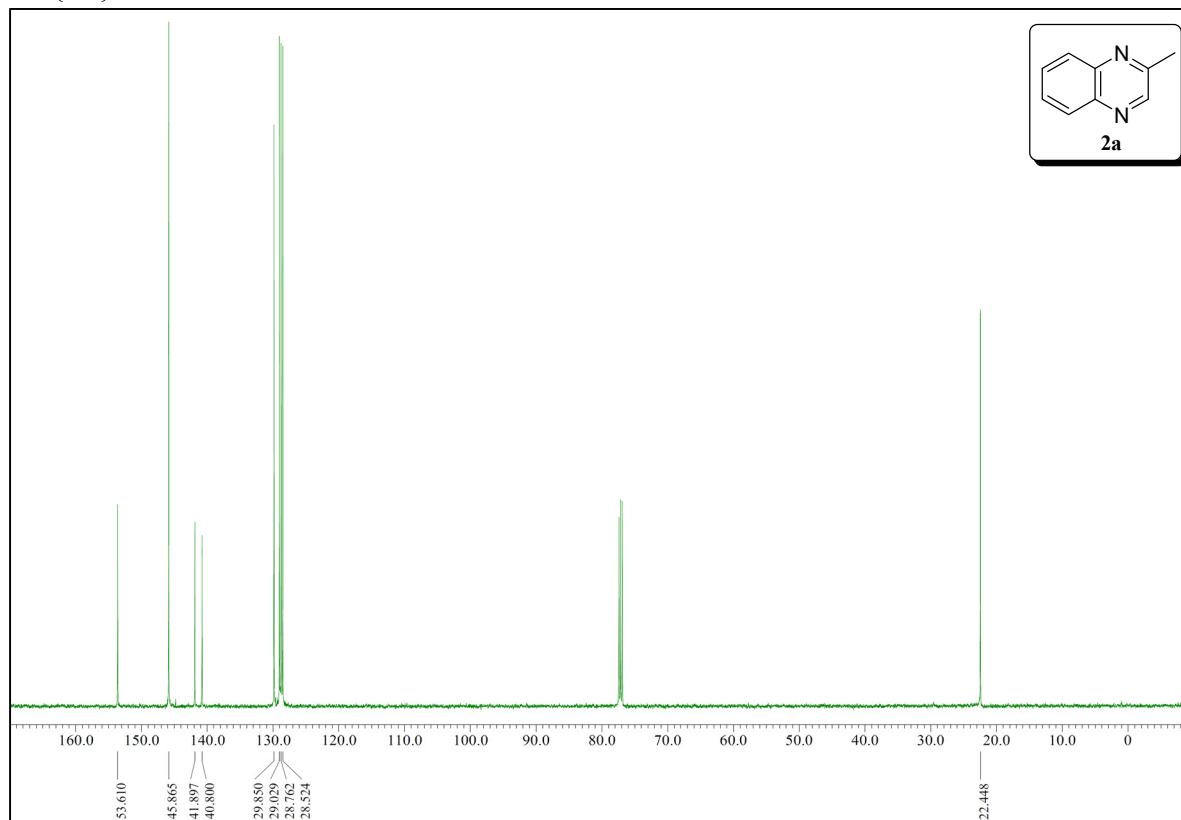

$^1\text{H}$  NMR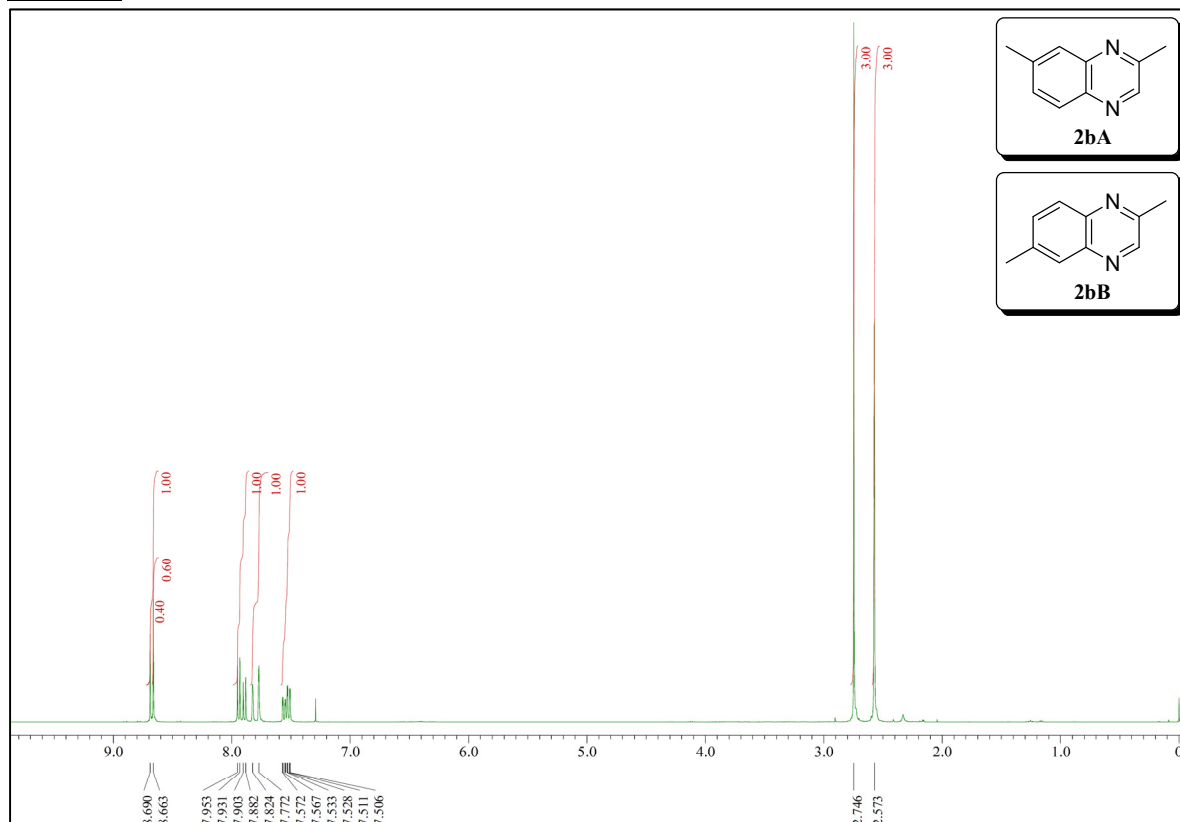 $^{13}\text{C}\{^1\text{H}\}$  NMR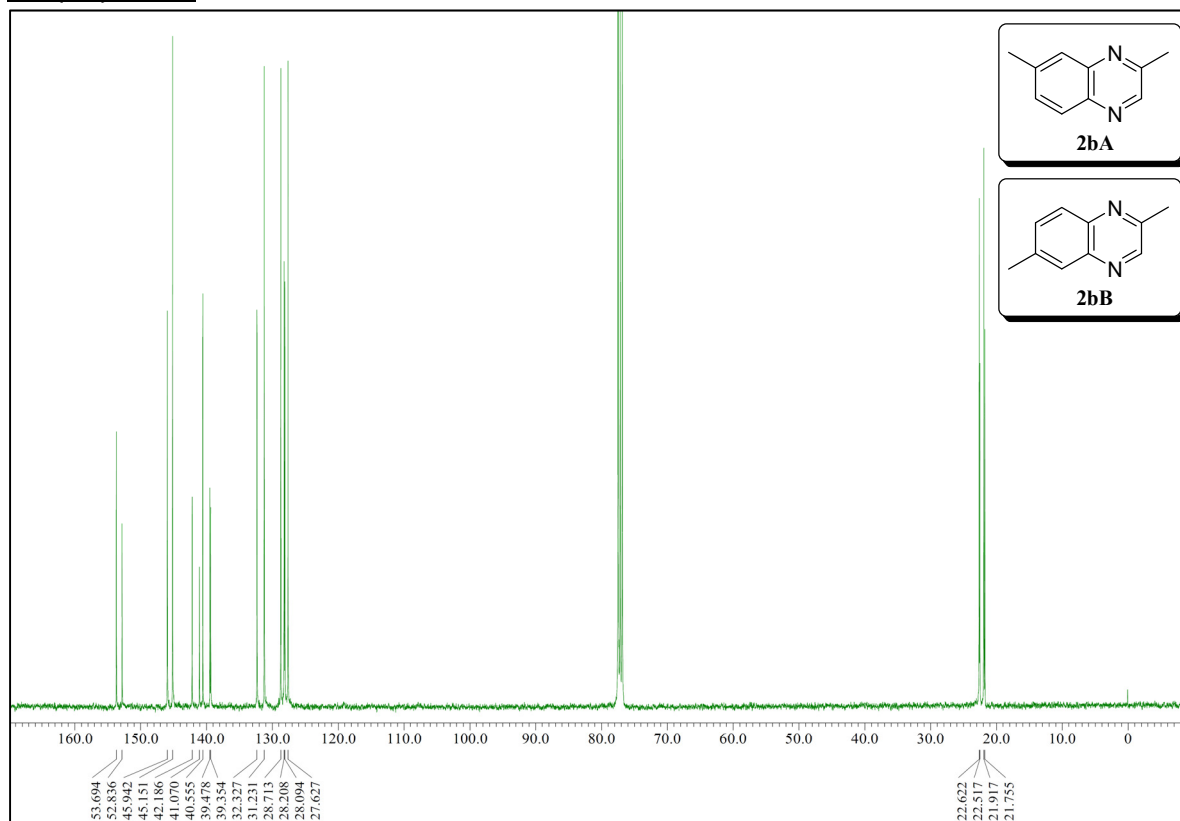

$^1\text{H}$  NMR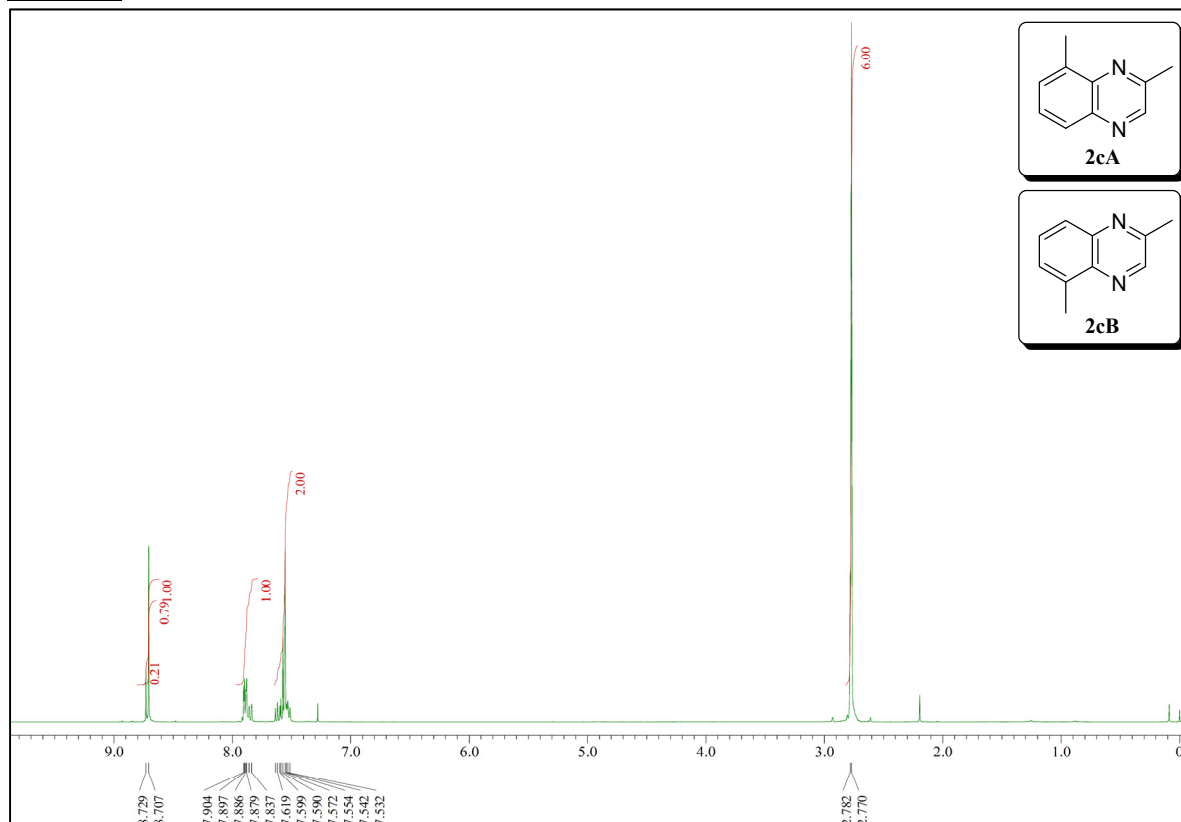 $^{13}\text{C}\{^1\text{H}\}$  NMR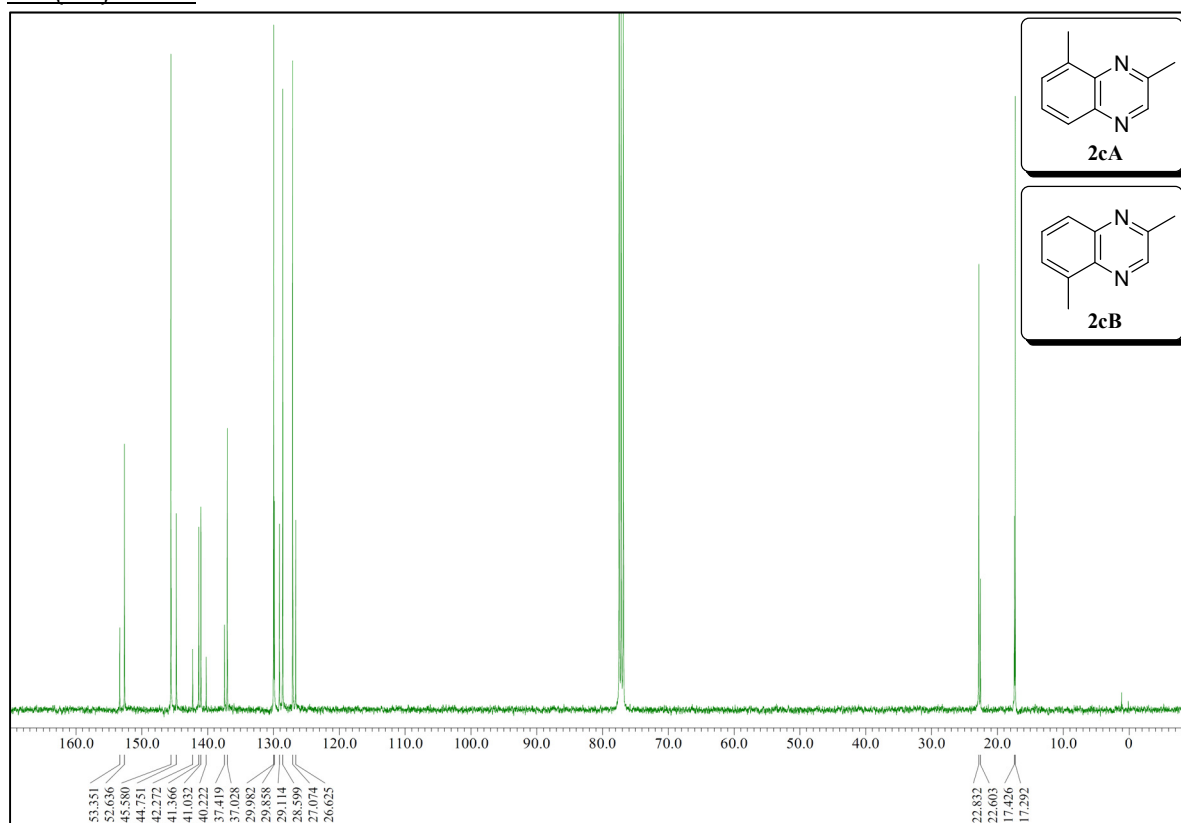

<sup>1</sup>H NMR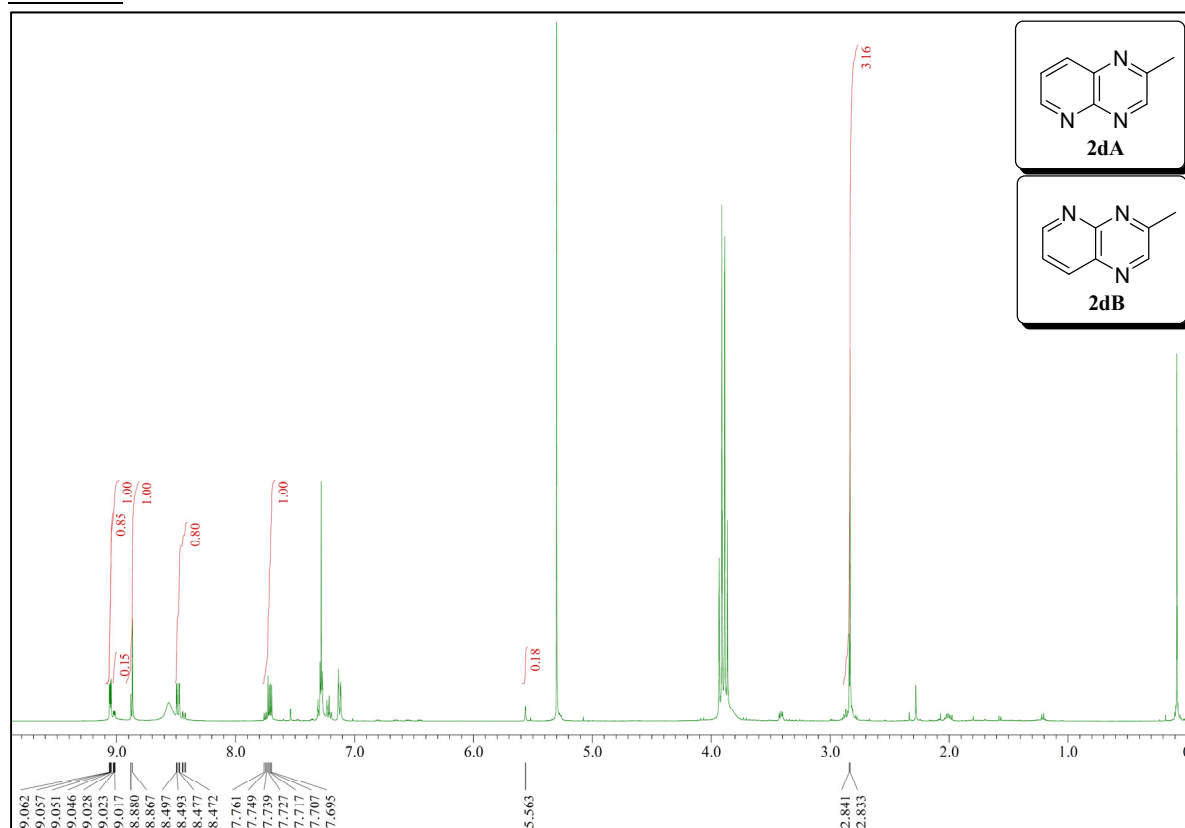

A signal at 5.563 ppm is due to triphenylmethane which was used as an internal standard.

$^1\text{H}$  NMR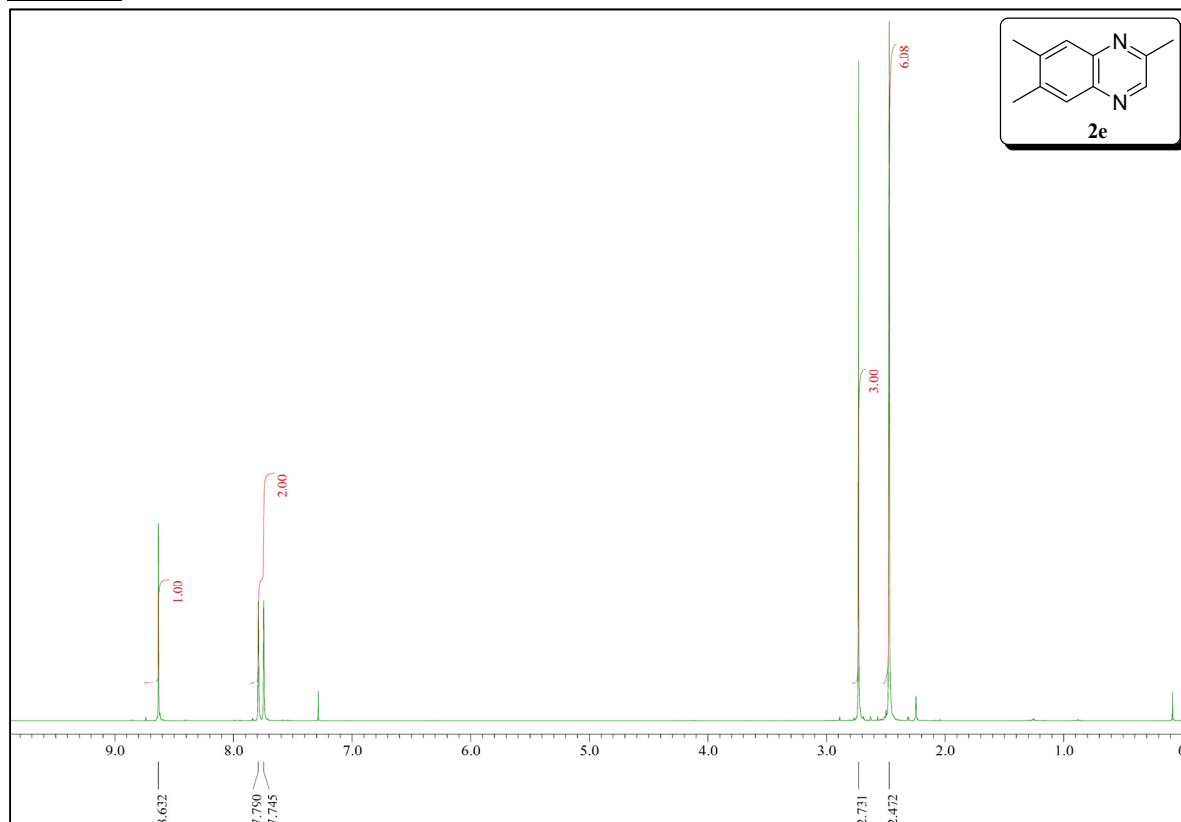 $^{13}\text{C}\{^1\text{H}\}$  NMR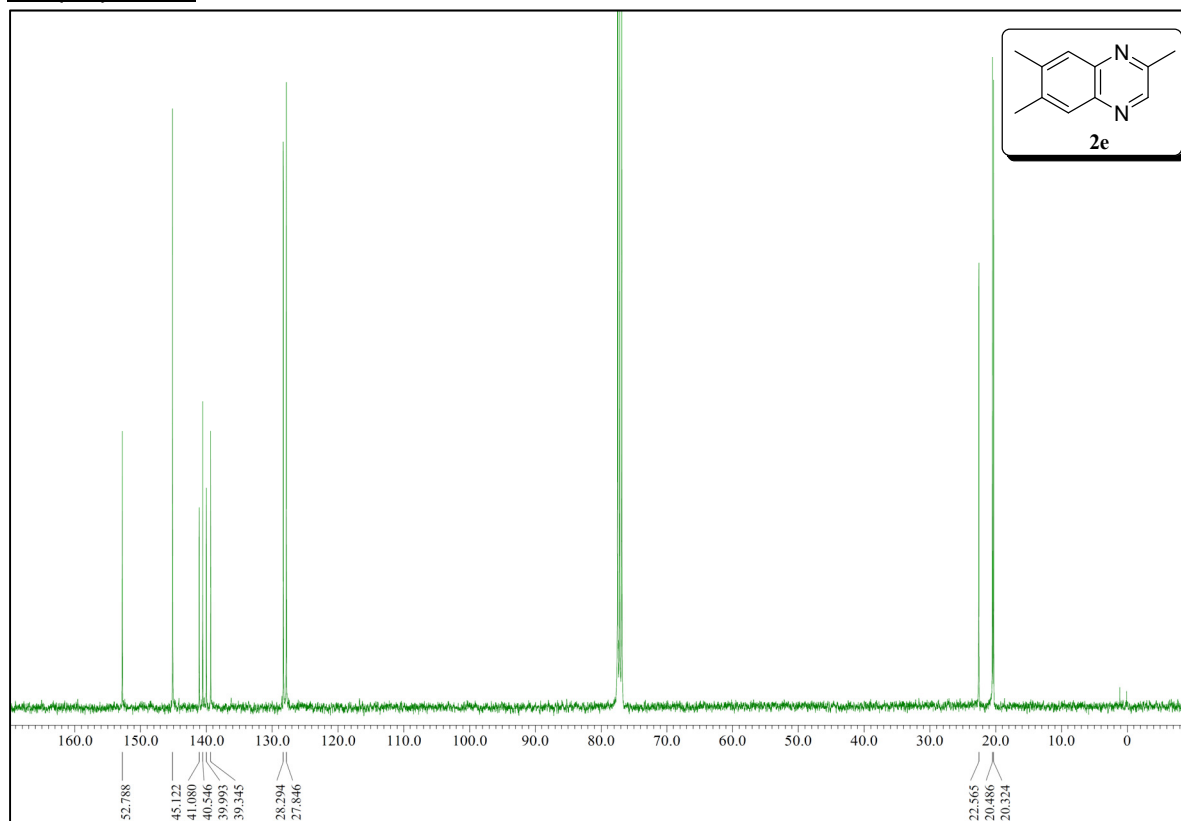



$^1\text{H}$  NMR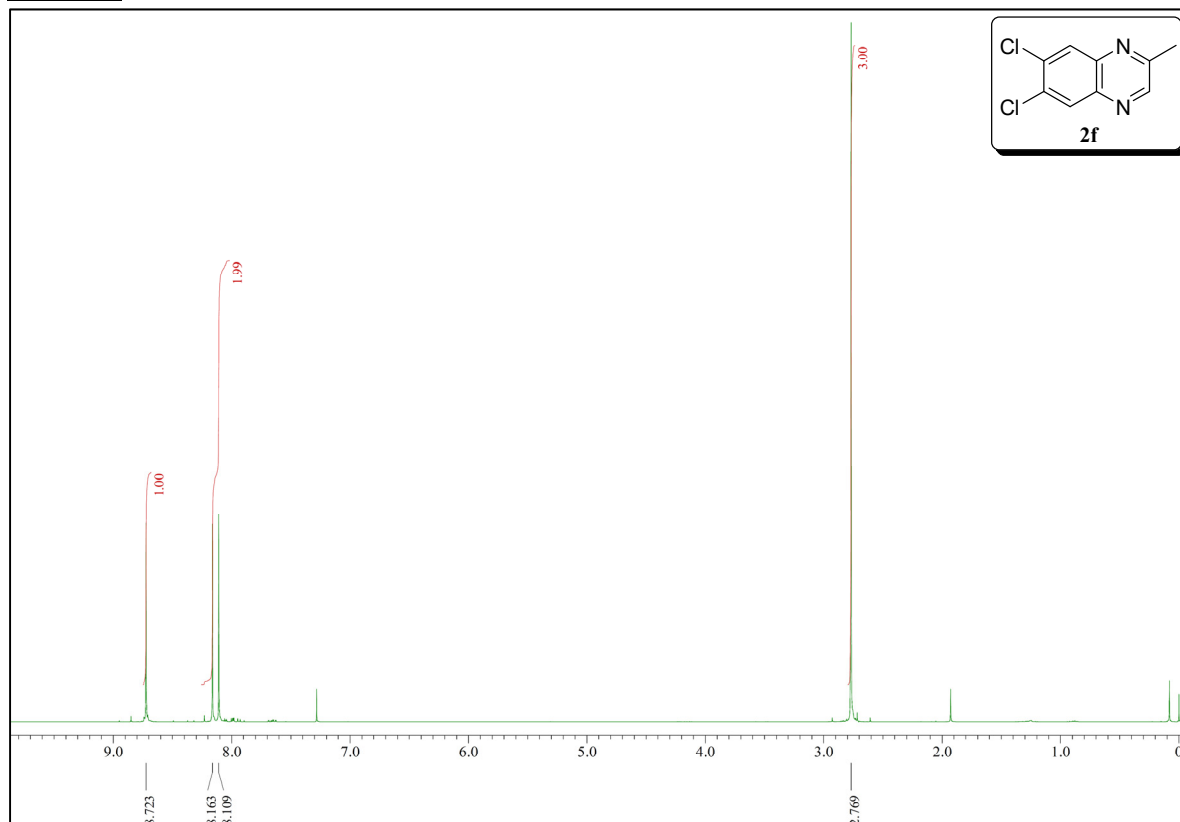 $^{13}\text{C}\{^1\text{H}\}$  NMR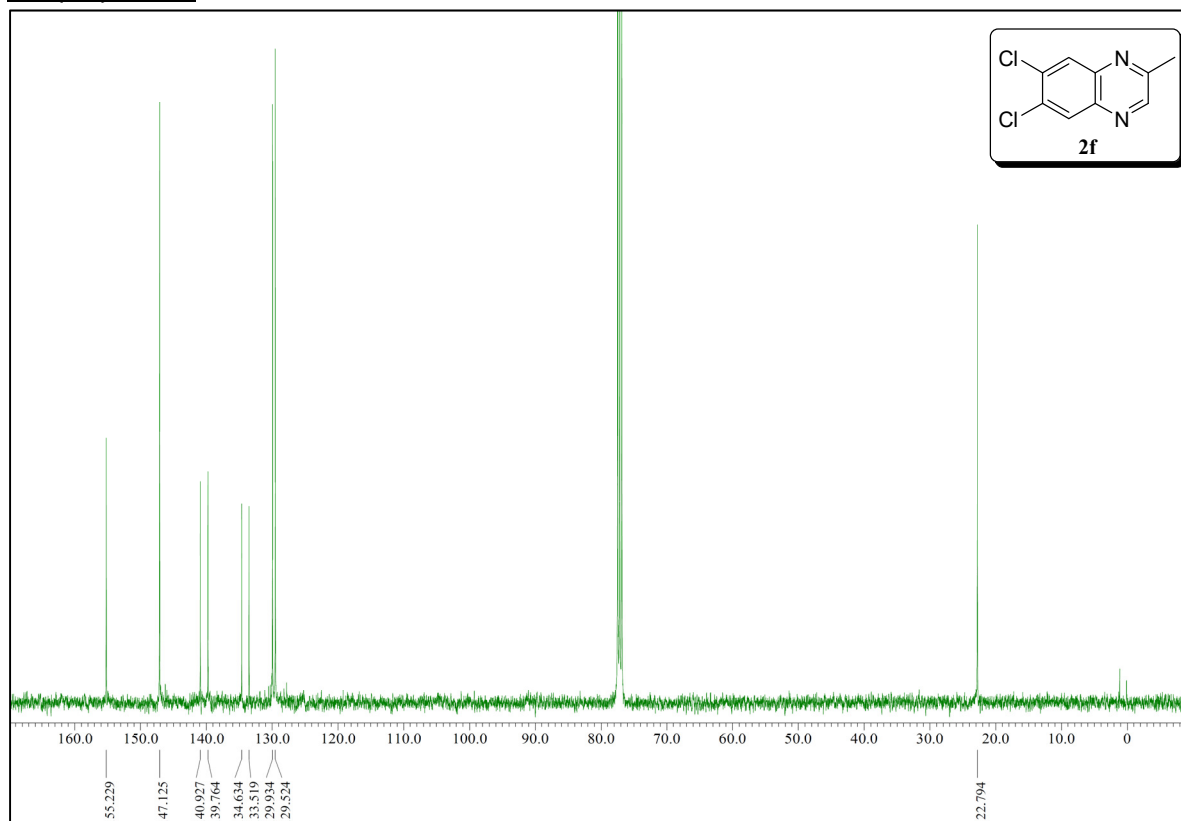

$^1\text{H}$  NMR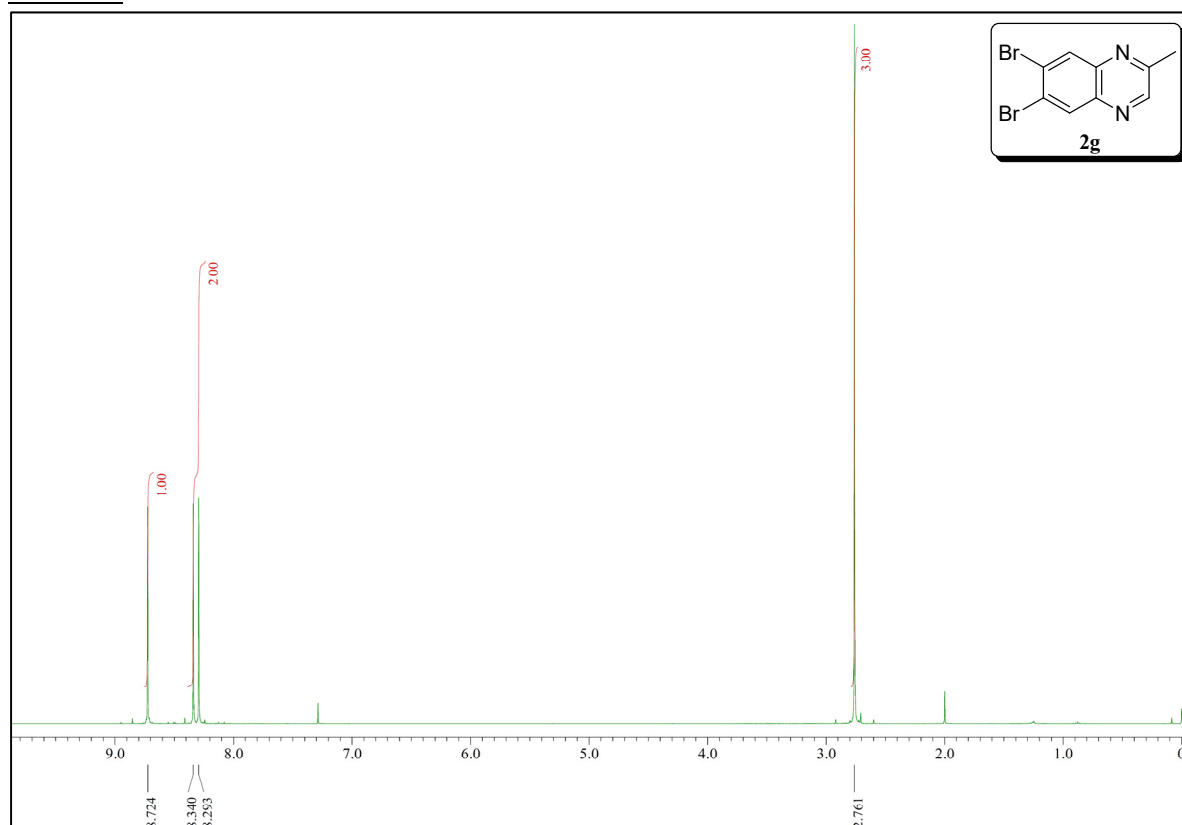 $^{13}\text{C}\{^1\text{H}\}$  NMR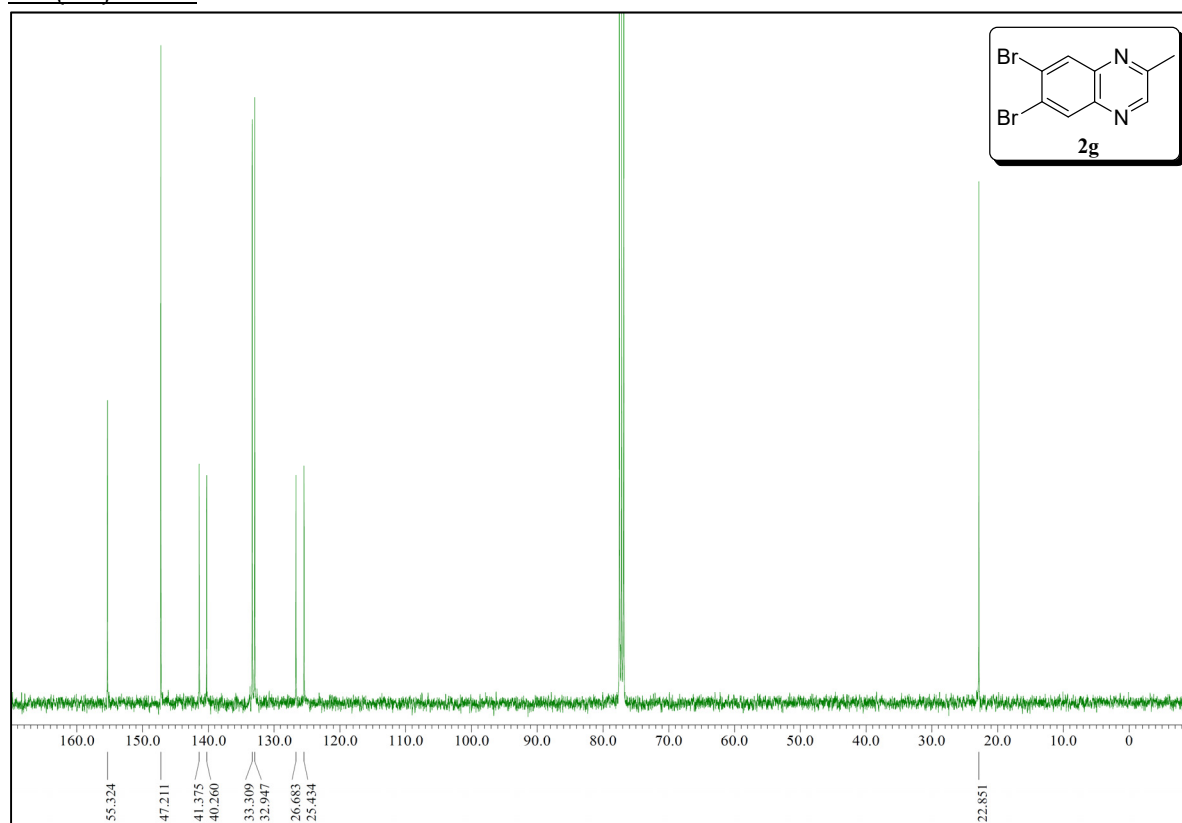

$^1\text{H}$  NMR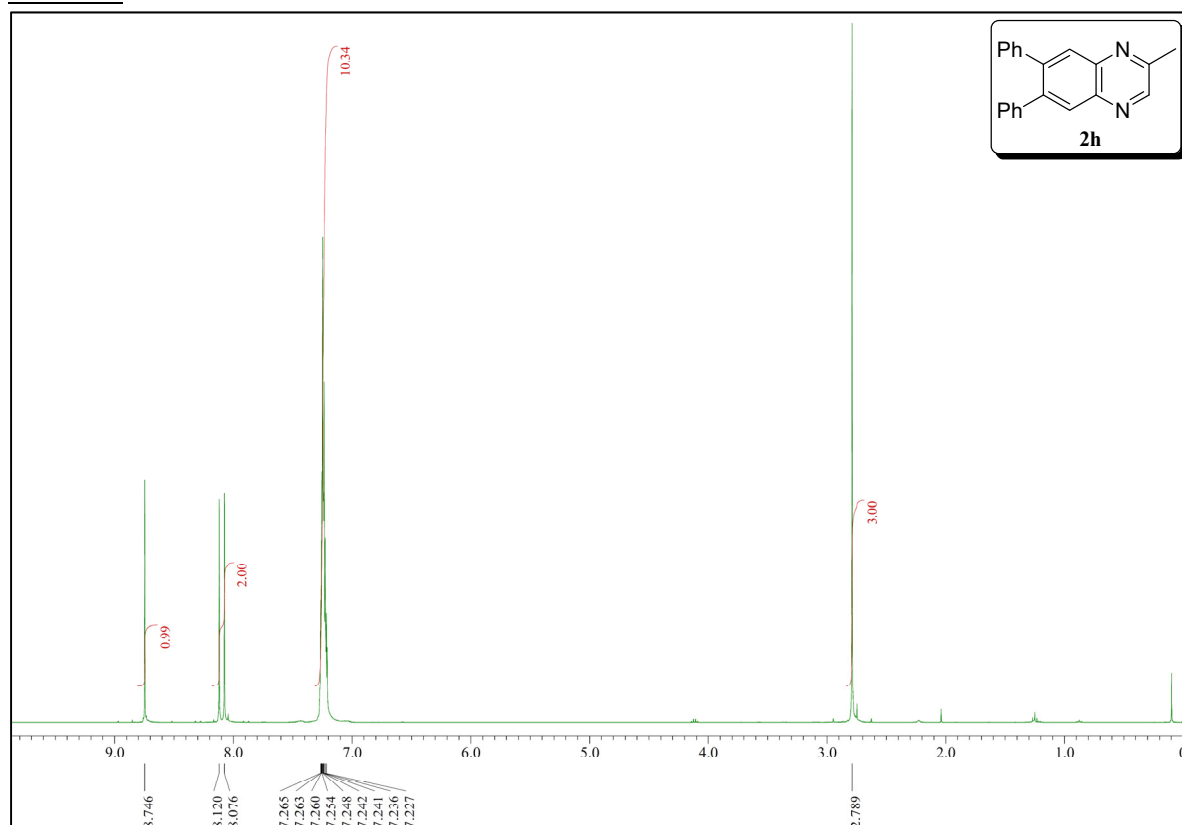 $^{13}\text{C}\{^1\text{H}\}$  NMR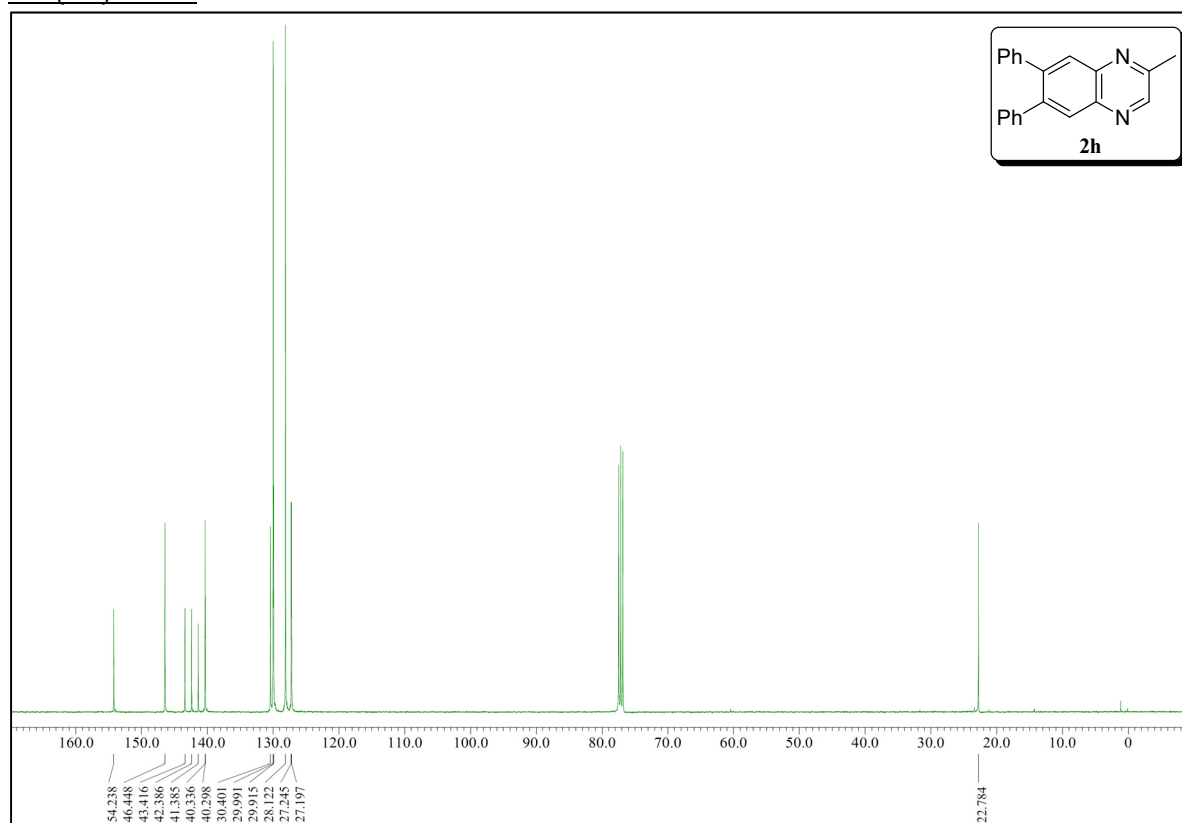

Supplement: s1 [file s1]
